# Supplementary material
Source: ML conference proceedings conference paper supplement (https://proceedings.neurips.cc/paper_files/paper/2012/hash/b495ce63ede0f4efc9eec62cb947c162-Abstract.html)
Supplement: Supplementary file [file b495ce63ede0f4efc9eec62cb947c162-Supplemental.zip]

---

# Supplementary Material: A Neural Autoregressive Topic Model

---

**Hugo Larochelle**  
Département d'informatique  
Université de Sherbrooke  
*hugo.larochelle@usherbrooke.ca*

**Stanislas Lauly**  
Département d'informatique  
Université de Sherbrooke  
*stanislas.lauly@usherbrooke.ca*

## Abstract

We provide additional details on our submission.

## 1 Pseudocode for computation of $p(\mathbf{v})$ and learning gradients for DocNADE

**Input:** training document vector  $\mathbf{v}$

**Output:**  $p(\mathbf{v})$  and gradients of  $-\log p(\mathbf{v})$  on parameters

```
# Computing  $p(\mathbf{v})$ 
 $\mathbf{a} \leftarrow \mathbf{c}$ 
 $p(\mathbf{v}) \leftarrow 1$ 
for  $i$  from 1 to  $D$  do
   $\mathbf{h}_i \leftarrow \text{sigm}(\mathbf{a})$  # for tanh activation, change to  $\mathbf{h}_i \leftarrow \text{tanh}(\mathbf{a})$ 
   $p(v_i = k | \mathbf{v}_{<i}) = 1$ 
  for  $m$  from 1 to  $|\pi(v_i)|$  do
     $p(v_i = k | \mathbf{v}_{<i}) \leftarrow p(v_i = k | \mathbf{v}_{<i}) p(\pi(v_i)_m | \mathbf{v}_{<i})$ 
  end for
   $p(\mathbf{v}) \leftarrow p(\mathbf{v}) p(v_i = k | \mathbf{v}_{<i})$ 
   $\mathbf{a} \leftarrow \mathbf{a} + \mathbf{W}_{:,v_i}$ 
end for

# Computing gradients of  $-\log p(\mathbf{v})$ 
 $\delta \mathbf{a} \leftarrow 0$ 
 $\delta \mathbf{c} \leftarrow 0$ 
 $\delta \mathbf{b} \leftarrow 0$ 
for  $i$  from  $D$  to 1 do
   $\delta \mathbf{h}_i \leftarrow 0$ 
  for  $m$  from 1 to  $|\pi(v_i)|$  do
     $\delta b_{l(v_i)_m} \leftarrow \delta b_{l(v_i)_m} + (p(\pi(v_i)_m | \mathbf{v}_{<i}) - \pi(v_i)_m)$ 
     $\delta \mathbf{V}_{l(v_i)_m,:} \leftarrow \delta \mathbf{V}_{l(v_i)_m,:} + (p(\pi(v_i)_m | \mathbf{v}_{<i}) - \pi(v_i)_m) \mathbf{h}_i^\top$ 
     $\delta \mathbf{h}_i \leftarrow \delta \mathbf{h}_i + (p(\pi(v_i)_m | \mathbf{v}_{<i}) - \pi(v_i)_m) \mathbf{V}_{l(v_i)_m,:}^\top$ 
  end for
   $\delta \mathbf{g} \leftarrow \mathbf{h}_i \circ (1 - \mathbf{h}_i)$  # for tanh activation, change to  $\delta \mathbf{g} \leftarrow (1 - \mathbf{h}_i^2)$ 
   $\delta \mathbf{c} \leftarrow \delta \mathbf{c} + \delta \mathbf{h}_i \circ \delta \mathbf{g}$ 
   $\delta \mathbf{W}_{:,v_i} \leftarrow \delta \mathbf{W}_{:,v_i} + \delta \mathbf{a}$ 
   $\delta \mathbf{a} \leftarrow \delta \mathbf{a} + \delta \mathbf{h}_i \circ \delta \mathbf{g}$ 
end for

return  $p(\mathbf{v}), \delta \mathbf{b}, \delta \mathbf{V}, \delta \mathbf{c}, \delta \mathbf{W}$ 
```

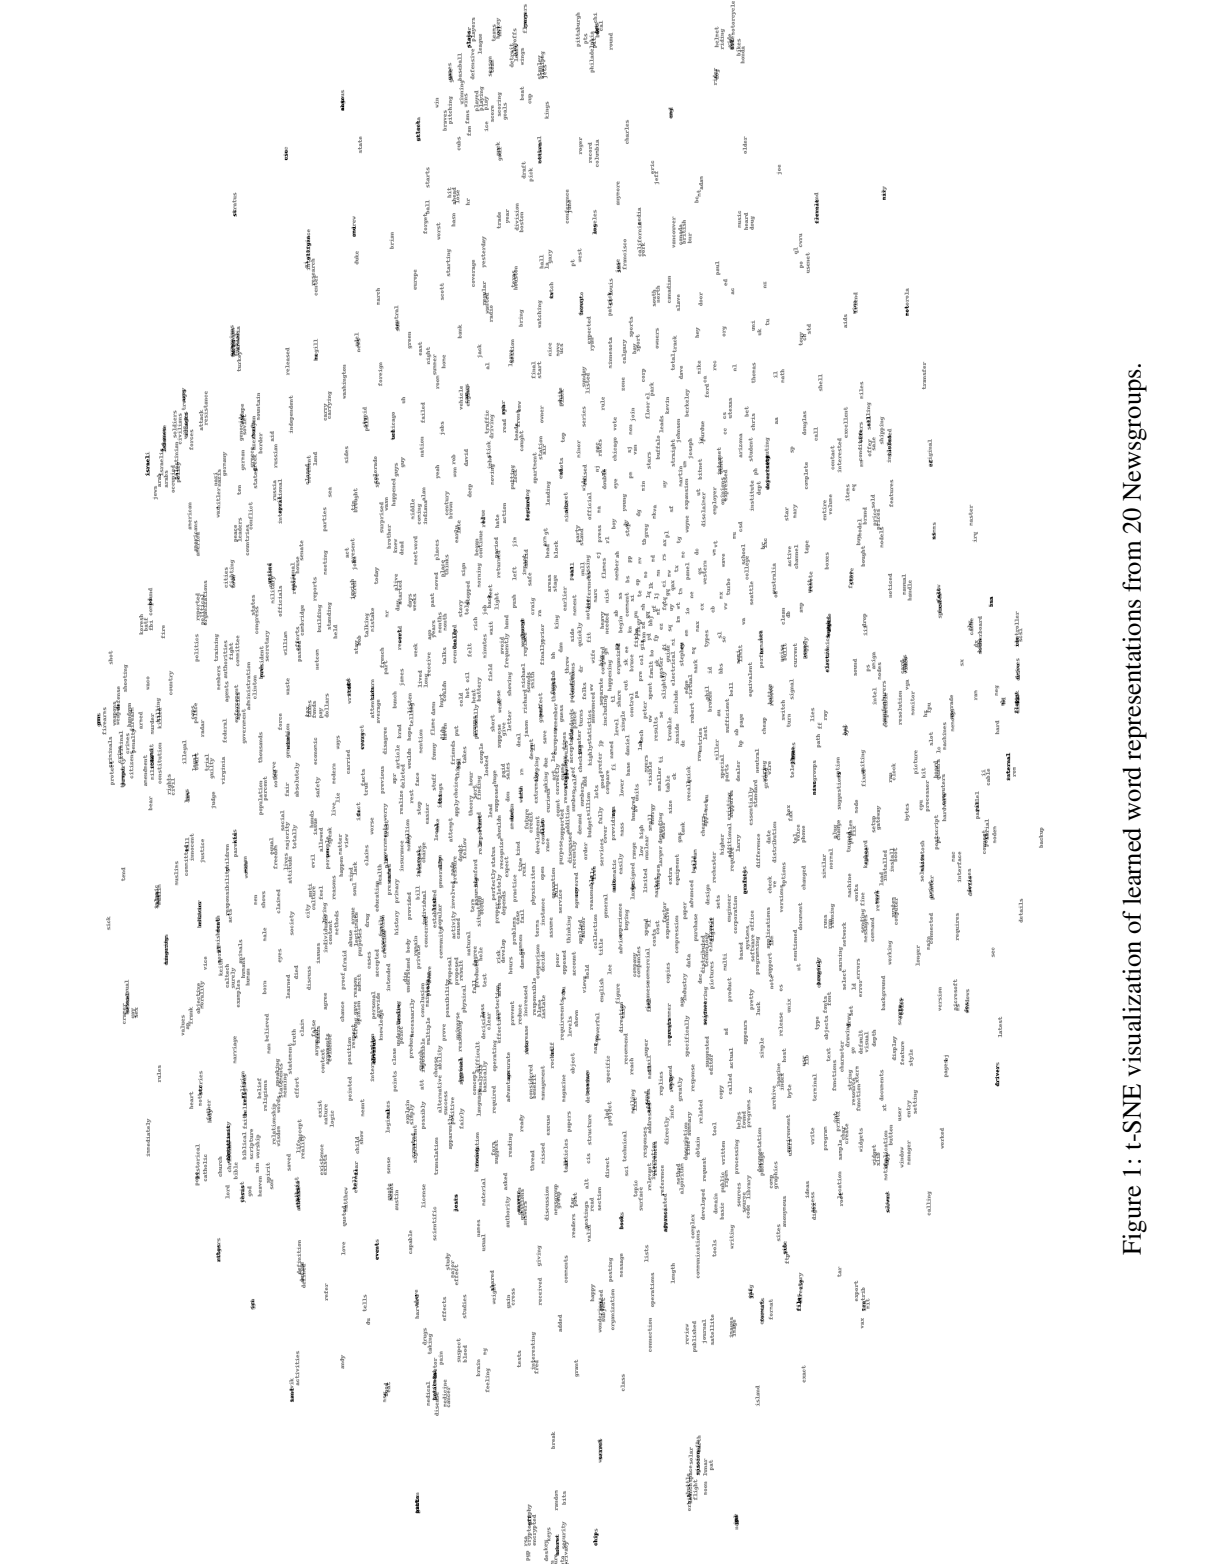

Figure 1: t-SNE visualization of learned word representations from 20 News groups.

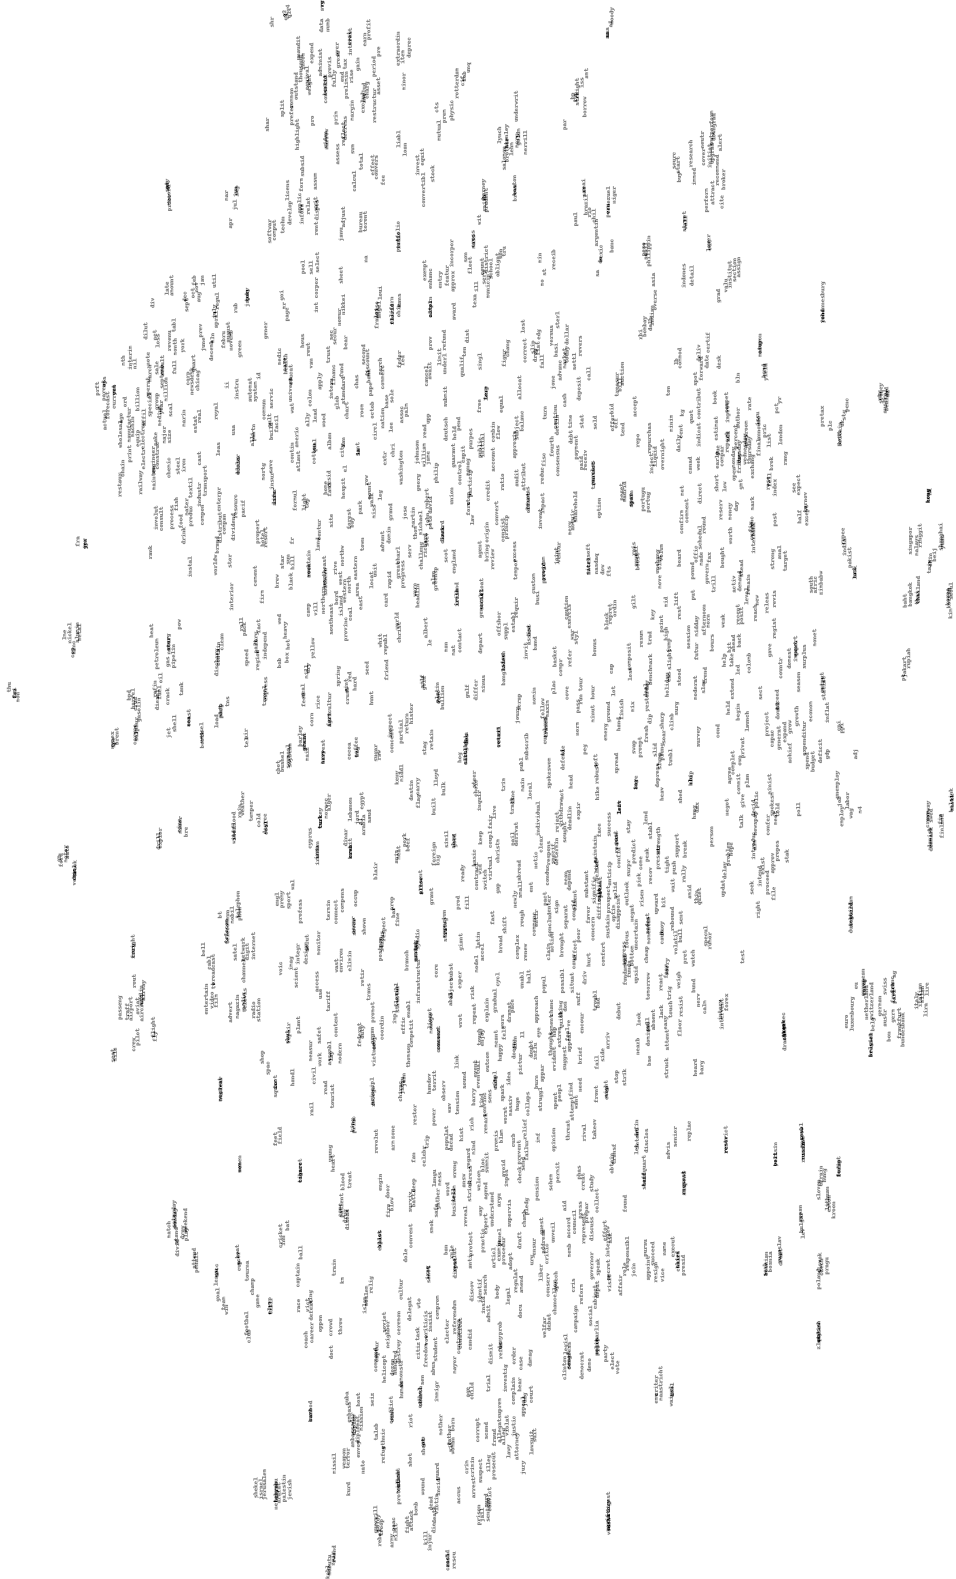

Figure 2: t-SNE visualization of learned word representations from RCv1-v2.
